# Supplementary material
Source: PubMed Central journal article supplement (PMC2757222)
Supplement: supp_M109.034140_jbc.M109.034140-1.pdf [file supp_M109.034140_jbc.M109.034140-1.pdf]

***SUPPLEMENTAL DATA***

*for the manuscript by*

Xiaoyu Liu, Takashi Daiho, Kazuo Yamasaki, Guoli Wang, Stefania Danko, and  
Hiroshi Suzuki

**Roles of Interaction between Actuator- and Nucleotide Binding-domains of  
Sarco(endoplasmic Reticulum  $\text{Ca}^{2+}$ -ATPase as Revealed by Single and Swap  
Mutational Analyses of Serine186 and Glutamate439**

## Supplemental Figure 1

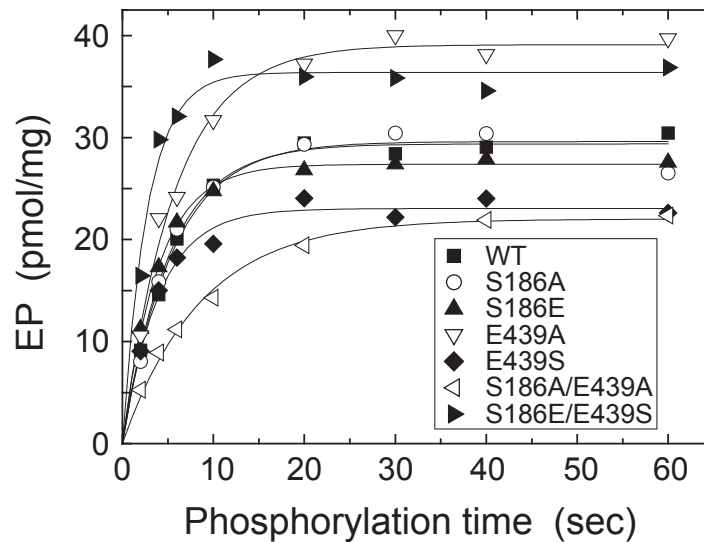

Supplemental Figure 1. **Phosphorylation upon simultaneous addition of ATP and Ca<sup>2+</sup>.** Microsomes expressing the wild-type or mutant SERCA1a (2  $\mu$ g of microsomal protein) were preincubated in the absence of Ca<sup>2+</sup> at 0 °C for 5 min in 50  $\mu$ l of a buffer containing 1 mM EGTA, 1  $\mu$ M A23187, 0.1 M KCl, 7 mM MgCl<sub>2</sub>, and 50 mM MES/Tris (pH 6.0). At zero time, an equal volume of the buffer containing 20  $\mu$ M [ $\gamma$ -<sup>32</sup>P]ATP and 1.2 mM CaCl<sub>2</sub> in place of EGTA otherwise as above, was added to the microsome suspension. At various times after this addition, the amount of EP formed was determined and shown as pmol/mg of microsomal protein.

## Supplemental Figure 2

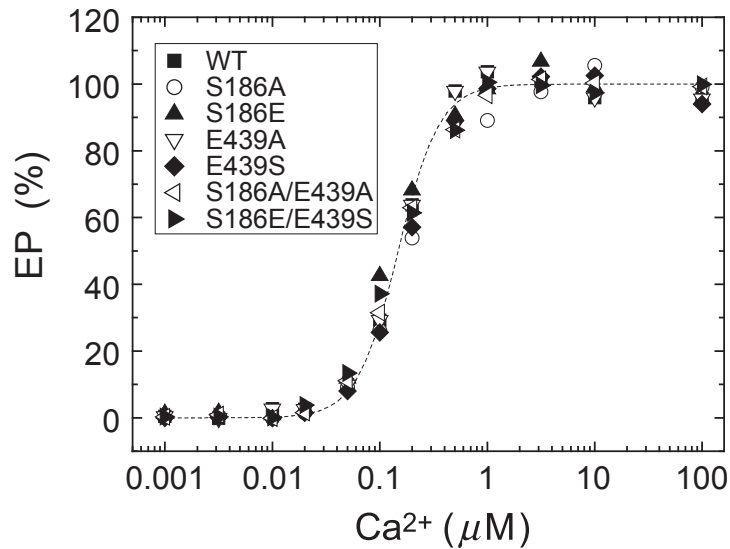

Supplemental Figure 2. **Ca<sup>2+</sup> dependence of EP formation from ATP.** Microsomes expressing the wild-type or mutant SERCA1a were preincubated with various concentrations of Ca<sup>2+</sup> as indicated at 25 °C for 15 min in 50 μl of a mixture containing 2 μg microsomal protein, 1 μM A23187, 0.1 M KCl, 7 mM MgCl<sub>2</sub>, 50 mM MOPS/Tris (pH 7.0), and various concentrations of CaCl<sub>2</sub> with 2 mM EGTA, and then cooled and phosphorylated at 0 °C for 15 s by addition of a small volume of [ $\gamma$ -<sup>32</sup>P]ATP to give 10 μM. The amount of EP formed was determined as described under “Experimental Procedures.” The data were best fitted with the Hill equation, and the EP<sub>max</sub> obtained in the fitting in each mutant was normalized to 100%. The dissociation constant for Ca<sup>2+</sup> ( $K_{0.5}$ ) and Hill coefficient ( $n_H$ ) thus obtained are given in Table 1. The *solid line* shows the least squares fit for the wild type.

## Supplemental Figure 3

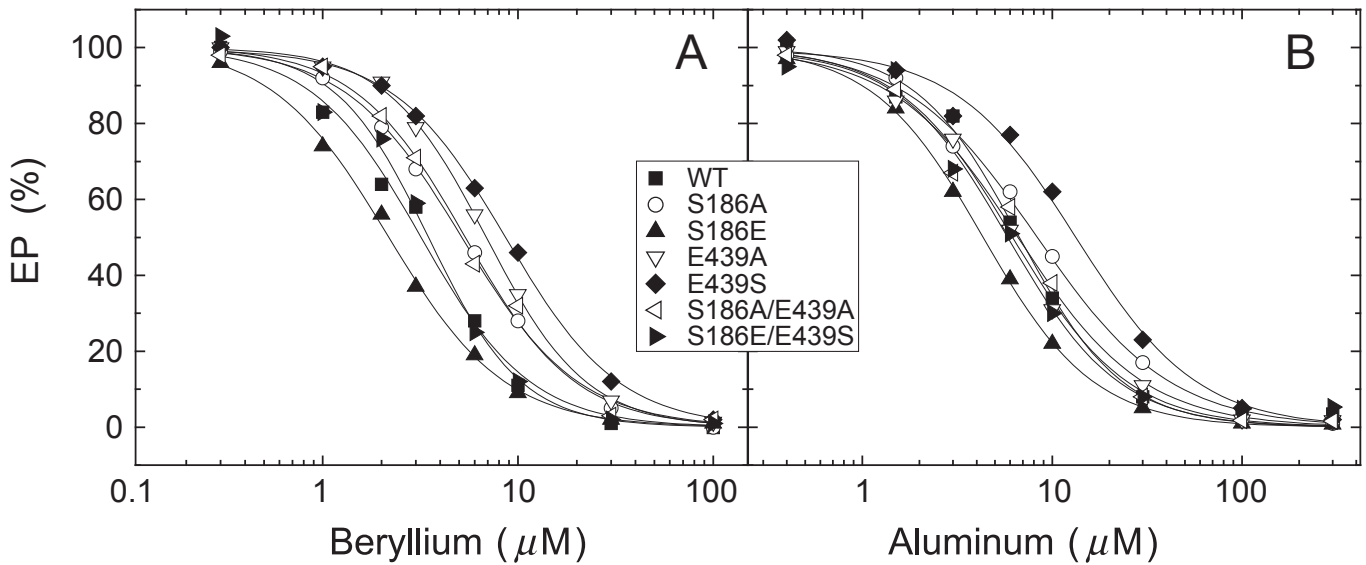

Supplemental Figure 3. **BeF<sub>3</sub><sup>-</sup> and AlF<sub>4</sub><sup>-</sup> binding to the E2-state ATPase.** Microsomes expressing the wild-type or mutant SERCA1a were incubated for 30 min at 25 °C in 50 μl of a mixture containing 50 mM MOPS/Tris (pH 7.0), 0.1 M LiCl, 2 mM EGTA, 200 μM MgCl<sub>2</sub>, 2 mM KF, and the indicated concentrations of BeSO<sub>4</sub> (A) or AlCl<sub>3</sub> (B). The samples were then cooled and phosphorylated by ATP at 0 °C by the addition of an equal volume of a buffer containing 4.2 mM CaCl<sub>2</sub>, 2 mM EGTA, 0.1 M LiCl, 9.8 mM MgCl<sub>2</sub>, 2 mM KF and 20 μM [ $\gamma$ -<sup>32</sup>P]ATP. The reaction was quenched by acid at 15 s. Solid lines show the least squares fit to the Hill equation, and  $K_{0.5}$  values are given in Table 1.
